# Supplementary material
Source: publisher figshare collection journal article supplement (https://acs.figshare.com/ndownloader/files/6059205)
Supplement: Supplementary file 1 [file 6059205]

Compound_ID	SMILES	IC50 ��M (Inhibitory activities against LPS-induced NO release in BV2 cells)
1	OC1=C(C(CC(C)C)=O)C(O)=CC(O)=C1	50.7
1a	OC1=C(C(CC(C)C)=O)C(OCC2=CC=CC=C2)=CC(OCC3=CC=CC=C3)=C1
1b	CC(C)CC(C1=C(OCC2OC2)C=C(OCC3=CC=CC=C3)C=C1OCC4=CC=CC=C4)=O
1c	CC(C)CC(C1=C(OC[C@H]2OC(C)(C)OC2)C=C(OCC3=CC=CC=C3)C=C1OCC4=CC=CC=C4)=O
1d	CC(C)CC(C1=C(OC[C@@H]2OC(C)(C)OC2)C=C(OCC3=CC=CC=C3)C=C1OCC4=CC=CC=C4)=O
1e	CC(C)CC(C1=C(OC[C@H](CO)O)C=C(OCC2=CC=CC=C2)C=C1OCC3=CC=CC=C3)=O
1f	CC(C)CC(C1=C(OC[C@@H](CO)O)C=C(OCC2=CC=CC=C2)C=C1OCC3=CC=CC=C3)=O
1g	CC(C)CC(C1=C(OC[C@H](COS(C2=CC=C(C)C=C2)(=O)=O)O)C=C(OCC3=CC=CC=C3)C=C1OCC4=CC=CC=C4)=O
1h	CC(C)CC(C1=C(OC[C@@H](COS(C2=CC=C(C)C=C2)(=O)=O)O)C=C(OCC3=CC=CC=C3)C=C1OCC4=CC=CC=C4)=O
2	OC1=CC(OC)=C(C(CC(C)C)=O)C(O)=C1	5.8
2a	OC1=C(C(CC(C)C)=O)C(OCOC)=CC(OCOC)=C1
2b	O=C(CC(C)C)C1=C(OC)C=C(OCOC)C=C1OCOC
3	OC1=C(C(CC(C)C)=O)C(OC)=CC(OC)=C1	51.5
3b	CC(C)CC(C1=C(OCC2OC2)C=C(OC)C=C1OC)=O
3c	CC(C)CC(C1=C(OC[C@H]2OC(C)(C)OC2)C=C(OC)C=C1OC)=O
3d	CC(C)CC(C1=C(OC[C@@H]2OC(C)(C)OC2)C=C(OC)C=C1OC)=O
3e	CC(C)CC(C1=C(OC[C@@H](O)CO)C=C(OC)C=C1OC)=O
3f	CC(C)CC(C1=C(OC[C@H](O)CO)C=C(OC)C=C1OC)=O
3g	CC(C)CC(C1=C(OC[C@H](O)COS(C2=CC=C(C)C=C2)(=O)=O)C=C(OC)C=C1OC)=O
3h	CC(C)CC(C1=C(OC[C@@H](O)COS(C2=CC=C(C)C=C2)(=O)=O)C=C(OC)C=C1OC)=O
4	CC(C)CC(C1=C(OC)C=C(OC)C=C1OC)=O	11.1
5	OC1=C(C(CC(C)C)=O)C=CC(OC)=C1	113.4
5b	CC(C)CC(C1=C(OCC2OC2)C=C(OC)C=C1)=O
5c	CC(C)CC(C1=C(OC[C@H]2OC(C)(C)OC2)C=C(OC)C=C1)=O
5d	CC(C)CC(C1=C(OC[C@@H]2OC(C)(C)OC2)C=C(OC)C=C1)=O
5e	CC(C)CC(C1=C(OC[C@@H](O)CO)C=C(OC)C=C1)=O
5f	CC(C)CC(C1=C(OC[C@H](O)CO)C=C(OC)C=C1)=O
5g	CC(C)CC(C1=C(OC[C@H](O)COS(C2=CC=C(C)C=C2)(=O)=O)C=C(OC)C=C1)=O
5h	CC(C)CC(C1=C(OC[C@@H](O)COS(C2=CC=C(C)C=C2)(=O)=O)C=C(OC)C=C1)=O
6	OC1=CC=C(C(CC(C)C)=O)C=C1	90.7
7	OC1=CC(O)=C(C(CCCC)=O)C(O)=C1	11.2
8	OC1=CC(O)=C(C(C)=O)C(O)=C1	194.7
9	OC1=CC(O)=C(C(NC(C)C)=O)C(O)=C1	92.6
9a	OC1=CC(O)=C(C(Cl)=O)C(O)=C1
10	OC1=CC(O)=C(C(NCCCC)=O)C(O)=C1	37.1
11	O=C(CN1CCCCC1)C2=C(OC)C=C(OC)C=C2OC	24.9
11a	[NH2+]=C(CCl)C1=C(OC)C=C(OC)C=C1OC
11b	O=C(CCl)C1=C(OC)C=C(OC)C=C1OC
12	O=C(CN1CCOCC1)C2=C(OC)C=C(OC)C=C2OC	32.4
13	O=C(CN1CCN(C)CC1)C2=C(OC)C=C(OC)C=C2OC	95.3
14	O=C(CN1CCN(CC)CC1)C2=C(OC)C=C(OC)C=C2OC	22.7
15	OC1=C(C(CCC[NH+]2CCCCC2)=O)C(O)=CC(O)=C1.[Cl-]	182.2
15a	N#CCCCN1CCCCC1
16	OC1=C(C(CCC[NH+](C2CCCCC2)C)=O)C(O)=CC(O)=C1.[Cl-]	54.8
16a	CN(CCCC#N)C1CCCCC1
17	OC1=C(C(CCC[NH+]2CC[NH+](C3=CC(Cl)=CC=C3)CC2)=O)C(O)=CC(O)=C1.[Cl-].[Cl-]
17a	ClC1=CC=CC(N(CC2)CCN2CCCC#N)=C1
18	CC(C)NCC1=C(OC)C=C(OC)C=C1OC
19	OC(CNCC1=C(OC)C=C(OC)C=C1OC)=O
19a	O=C(OCC)CNCC1=C(OC)C=C(OC)C=C1OC
20	OC([C@H](C)NCC1=C(OC)C=C(OC)C=C1OC)=O	39.1
20a	O=C(OC)[C@H](C)NCC1=C(OC)C=C(OC)C=C1OC
21	OC([C@H](CO)NCC1=C(OC)C=C(OC)C=C1OC)=O	6.6
21a	O=C(OC)[C@H](CO)NCC1=C(OC)C=C(OC)C=C1OC
22	OC([C@H](CC(O)=O)NCC1=C(OC)C=C(OC)C=C1OC)=O	14.4
22a	O=C(OC)[C@H](CC(OC)=O)NCC1=C(OC)C=C(OC)C=C1OC
23	OC([C@H](CCC(O)=O)NCC1=C(OC)C=C(OC)C=C1OC)=O	8.4
23a	O=C(OC)[C@H](CCC(OC)=O)NCC1=C(OC)C=C(OC)C=C1OC
24	OC([C@H](CC1=CC=CC=C1)NCC2=C(OC)C=C(OC)C=C2OC)=O
24a	O=C(OC)[C@H](CC1=CC=CC=C1)NCC2=C(OC)C=C(OC)C=C2OC
25	OC([C@H](CC1=CN=CN1)NCC2=C(OC)C=C(OC)C=C2OC)=O
25a	O=C(OC)[C@H](CC1=CN=CN1)NCC2=C(OC)C=C(OC)C=C2OC
26	CC(C)CC(C1=C(OCC(O)C[N+]([H])([H])C(C)C)C=C(OC)C=C1OC)=O.[Cl-]	84.8
27	CC(C)CC(C1=C(OCC(O)C[N+]([H])([H])C(C)(C)C)C=C(OC)C=C1OC)=O.[Cl-]	75
28	CC(C)CC(C1=C(OCC(O)C[N+]([H])([H])C(C)C)C=C(OC)C=C1)=O.[Cl-]
29	CC(C)CC(C1=C(OCC(O)C[N+]([H])([H])C(C)(C)C)C=C(OC)C=C1)=O.[Cl-]	137.5
30	OC1=CC(OCC(O)C[N+]([H])([H])C(C)C)=C(C(CC(C)C)=O)C(O)=C1.[Cl-]	74
30a	CC(C)CC(C1=C(OCC(O)C[N+]([H])([H])C(C)C)C=C(OCC2=CC=CC=C2)C=C1OCC3=CC=CC=C3)=O.[Cl-]
31	OC1=CC(OCC(O)C[N+]([H])([H])C(C)(C)C)=C(C(CC(C)C)=O)C(O)=C1.[Cl-]	21.7
31a	CC(C)CC(C1=C(OCC(O)C[N+]([H])([H])C(C)(C)C)C=C(OCC2=CC=CC=C2)C=C1OCC3=CC=CC=C3)=O.[Cl-]
32	CC(C)CC(C1=C(OC[C@@H](O)C[N+]([H])([H])C(C)C)C=C(OC)C=C1OC)=O.[Cl-]	138.4
33	CC(C)CC(C1=C(OC[C@H](O)C[N+]([H])([H])C(C)C)C=C(OC)C=C1OC)=O.[Cl-]	41.3
34	CC(C)CC(C1=C(OC[C@@H](O)C[N+]([H])([H])C(C)(C)C)C=C(OC)C=C1OC)=O.[Cl-]	11.2
35	CC(C)CC(C1=C(OC[C@H](O)C[N+]([H])([H])C(C)(C)C)C=C(OC)C=C1OC)=O.[Cl-]
36	CC(C)CC(C1=C(OC[C@@H](O)C[N+]([H])([H])C(C)C)C=C(OC)C=C1)=O.[Cl-]	25.6
37	CC(C)CC(C1=C(OC[C@H](O)C[N+]([H])([H])C(C)C)C=C(OC)C=C1)=O.[Cl-]	40.9
38	CC(C)CC(C1=C(OC[C@@H](O)C[N+]([H])([H])C(C)(C)C)C=C(OC)C=C1)=O.[Cl-]	53.8
39	CC(C)CC(C1=C(OC[C@H](O)C[N+]([H])([H])C(C)(C)C)C=C(OC)C=C1)=O.[Cl-]	28.2
40	OC1=CC(OC[C@@H](O)C[N+]([H])([H])C(C)C)=C(C(CC(C)C)=O)C(O)=C1.[Cl-]
40a	CC(C)CC(C1=C(OC[C@@H](O)C[N+]([H])([H])C(C)C)C=C(OCC2=CC=CC=C2)C=C1OCC3=CC=CC=C3)=O.[Cl-]
41	OC1=CC(OC[C@H](O)C[N+]([H])([H])C(C)C)=C(C(CC(C)C)=O)C(O)=C1.[Cl-]
41a	CC(C)CC(C1=C(OC[C@H](O)C[N+]([H])([H])C(C)C)C=C(OCC2=CC=CC=C2)C=C1OCC3=CC=CC=C3)=O.[Cl-]
42	OC1=CC(OC[C@@H](O)C[N+]([H])([H])C(C)(C)C)=C(C(CC(C)C)=O)C(O)=C1.[Cl-]	24.1
42a	CC(C)CC(C1=C(OC[C@@H](O)C[N+]([H])([H])C(C)(C)C)C=C(OCC2=CC=CC=C2)C=C1OCC3=CC=CC=C3)=O.[Cl-]
43	OC1=CC(OC[C@H](O)C[N+]([H])([H])C(C)(C)C)=C(C(CC(C)C)=O)C(O)=C1.[Cl-]	37.3
43a	CC(C)CC(C1=C(OC[C@H](O)C[N+]([H])([H])C(C)(C)C)C=C(OCC2=CC=CC=C2)C=C1OCC3=CC=CC=C3)=O.[Cl-]
44	OC1=CC(O)=C(C(CC(C)C)=O)C(OCC2=[N+]([O-])ON=C2C3=CC=CC=C3)=C1	8.5
44a	OCC1=[N+]([O-])ON=C1C2=CC=CC=C2
44b	ClCC1=[N+]([O-])ON=C1C2=CC=CC=C2
44c	O=C(CC(C)C)C1=C(OCOC)C=C(OCOC)C=C1OCC2=[N+]([O-])ON=C2C3=CC=CC=C3
